# Supplementary material
Source: PubMed Central journal article supplement (PMC3519981)
Supplement: mt2012145x1.pdf [file mt2012145x1.pdf]

**Fig. S1. Comparison of the angiogenic and cardiomyocyte properties of intact and SHAM animals in different time points**

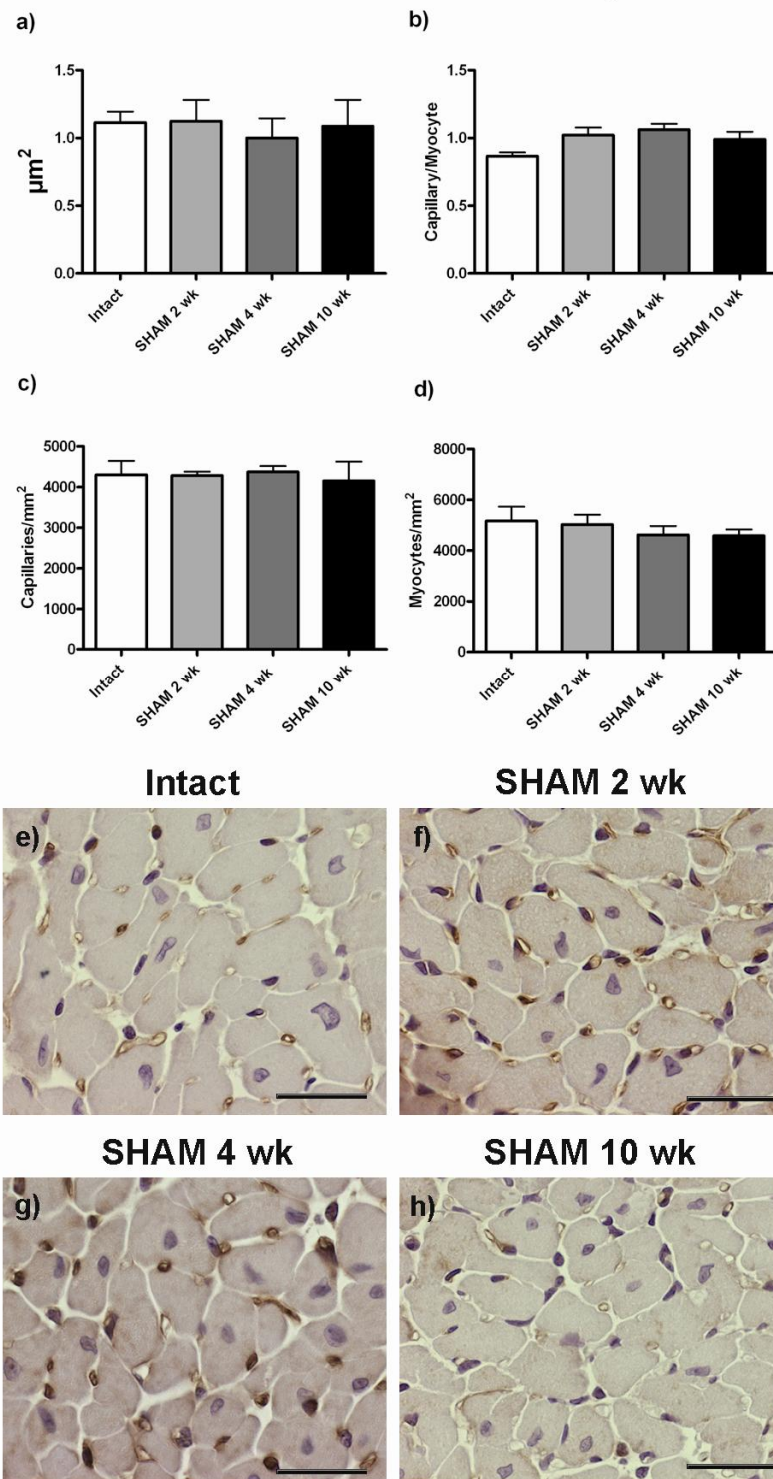

**Figure S1.** Angiogenic and cardiomyocyte parameters of intact and SHAM operated mice in different time points. No differences were seen in capillary area (a), capillary/myocyte ratio (b), capillary/ $\text{mm}^2$  (c) or myocyte/ $\text{mm}^2$  parameters between intact animals and SHAM operated animals. Statistical analyses with one-way ANOVA and Bonferroni's Multiple Comparison test,  $n = 3$ . Representative pictures from endothelial stainings with Biotinylated Griffonia (Bandeiraea) Simplicifolia Lectin I, scale bars 50  $\mu\text{m}$  (e-h).
